# Supplementary material for: Inhibition of the IGF signaling pathway reverses cisplatin resistance in ovarian cancer cells
Source: Springer Nature journal article supplement (doi:10.1186/s12885-017-3840-1), 2017-12-01

## Supplementary figures

**Figure S1.** Cell growth inhibition curves of A2780 cells and CP70 cells undergoing different treatments involving cisplatin (DDP) and metformin.

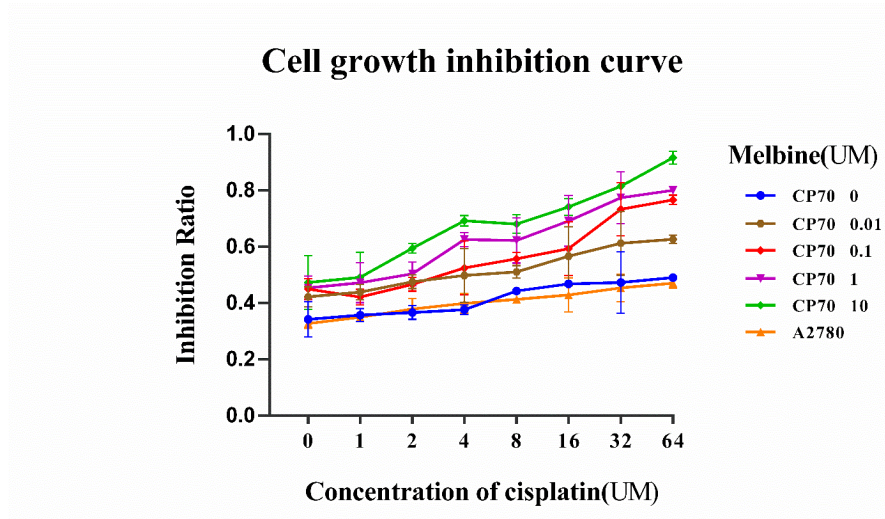

**Figure S2.** Weight of the mice inoculated with CP70 and A2780 that underwent different treatments involving cisplatin (DDP) and metformin cells over the study period.

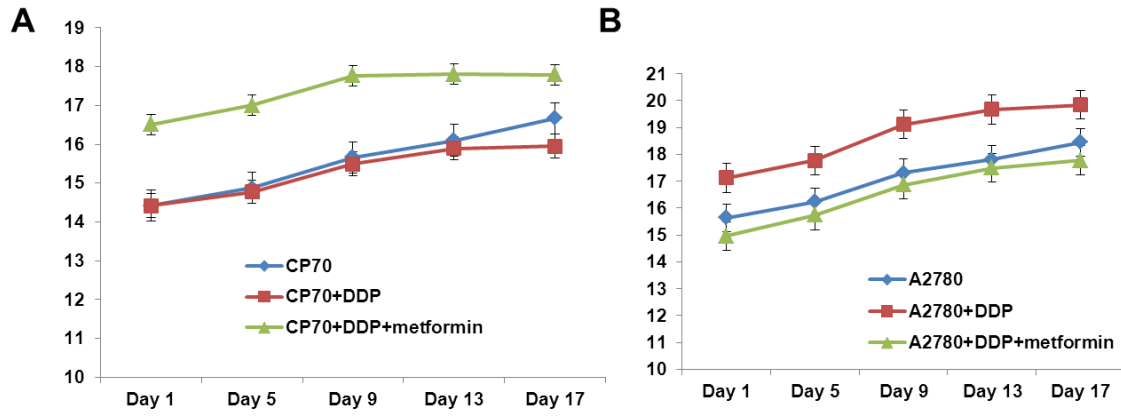

**Figure S3.** Tumor mass at 18 days of the mice inoculated with CP70 and A2780 cells and undergoing different treatments involving cisplatin (DDP) and metformin.

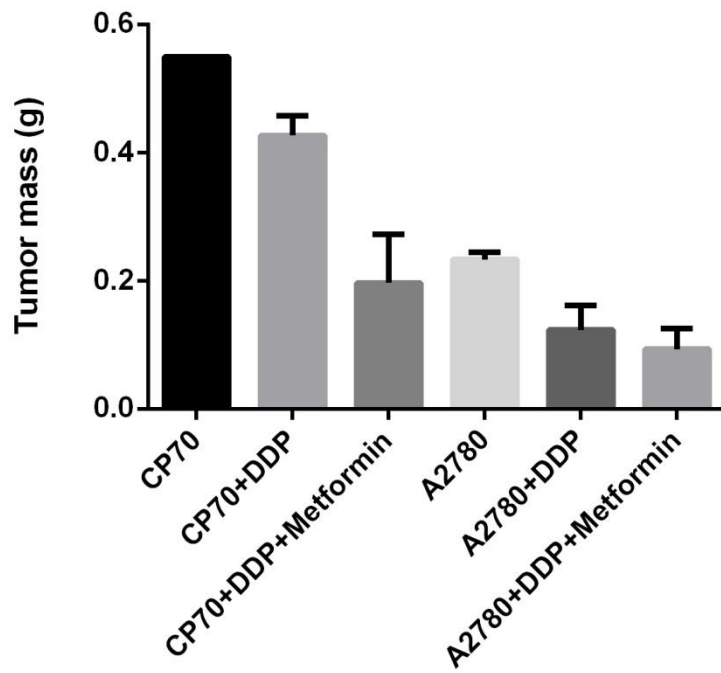

Supplement: 12885_2017_3840_MOESM1_ESM.pdf [file 12885_2017_3840_MOESM1_ESM.pdf]
